# Supplementary material for: A fluorescent sensor for highly selective sensing of nitro explosives and Hg(ii) ions based on a 3D porous layer metal–organic framework
Source: Royal Society of Chemistry journal article supplement (doi:10.1039/c6ce00745g), 2016-01-01
Supplement: c6ce00745g1.pdf [file c6ce00745g1.pdf]

## Electronic Supplementary Information (ESI)

# **A fluorescent sensor for highly selective sensing of nitro explosives and Hg (II) ion based on a 3D porous layer metal-organic framework**

Liu Yang, Xiao Li, Chao Qin,\* Kui-Zhan Shao, Zhong-Min Su\*

Institute of Functional Material Chemistry, Key Lab of Polyoxometalate Science of Ministry of Education, Faculty of Chemistry, Northeast Normal University, Changchun, 130024 Jilin, People's Republic of China.

\*E-mail: [qinc703@nenu.edu.cn](mailto:qinc703@nenu.edu.cn); [zmsu@nenu.edu.cn](mailto:zmsu@nenu.edu.cn)

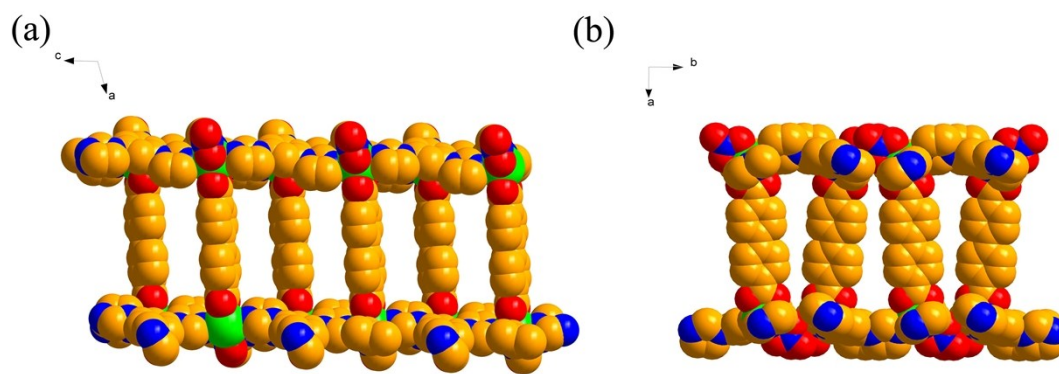

**Fig. S1** The space-filling structure of **1** along *b* axis (a) and *c* axis (b). All hydrogen atoms are omitted for clarity. The green, red and blue represent cadmium, oxygen and nitrogen atoms, respectively.

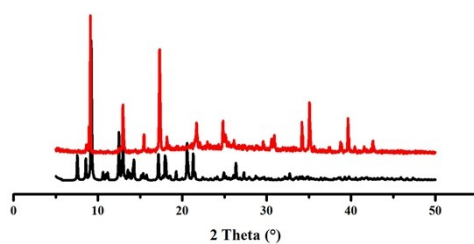

**Fig. S2** PXRD powder diffraction patterns of **1**: simulated (black), as-synthesized (red).

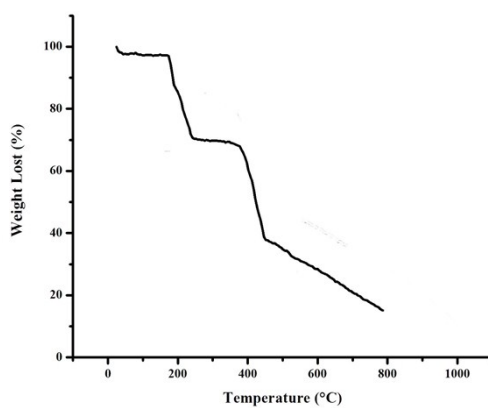

**Fig. S3** The TG curve of **1**.

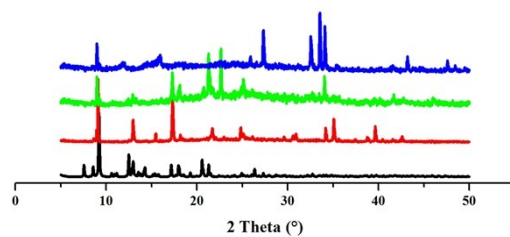

**Fig. S4** PXRD powder diffraction patterns of simulated (black), experimental (red), in boiled water for 3 days (green) and in boiled water for 7 days (blue) of **1**.

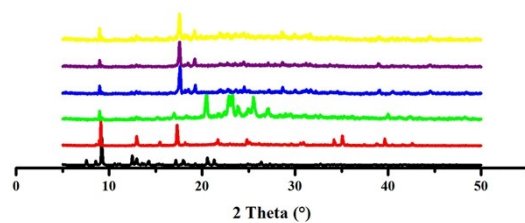

**Fig. S5** PXRD powder diffraction patterns of simulated (black), experimental (red), pH = 3 (green), pH = 4 (blue), pH = 10 (purple), pH = 11 (yellow) of **1**.

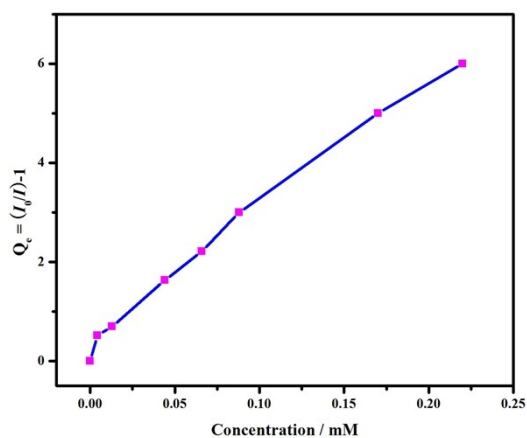

**Fig. S6** The Stern–Volmer plot for TNP.

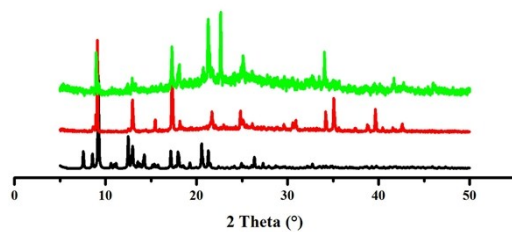

**Fig. S7** PXRD powder diffraction patterns of **1**: simulated (black), experimental (red), in TNP for five circulations.

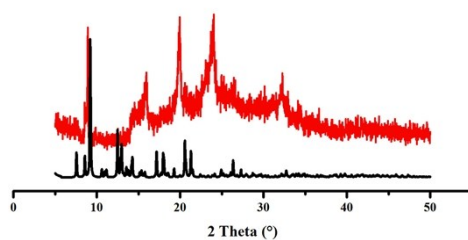

**Fig. S8** PXRD powder diffraction patterns patterns of simulated (black), in a  $\text{Hg}^{2+}$  solution with a concentration of  $1.0 \times 10^{-2}$  M for 5 hours (red) **1**.

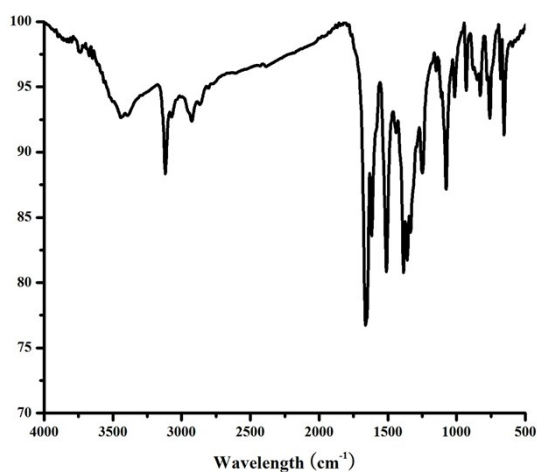

**Fig. S9** FT-IR spectra of **1**.

**Table S1** Selected Bonds Lengths (Å) and Angles (°) for **1**

| Compound <b>1</b> |            |                     |            |
|-------------------|------------|---------------------|------------|
| Cd(1)-N(1)        | 2.286(3)   | Cd(1)-N(6)#1        | 2.307(3)   |
| Cd(1)-N(4)#2      | 2.316(3)   | Cd(1)-O(1)          | 2.353(3)   |
| Cd(1)-O(2)        | 2.463(3)   | Cd(1)-O(3)          | 2.481(3)   |
| Cd(1)-O(4)        | 2.492(3)   | N(4)-Cd(1)#1        | 2.316(3)   |
| N(6)-Cd(1)#2      | 2.307(3)   | N(7)-O(3)-Cd(1)     | 95.85(19)  |
| N(7)-O(4)-Cd(1)   | 95.33(19)  | N(1)-Cd(1)-N(6)#1   | 92.14(10)  |
| N(1)-Cd(1)-N(4)#2 | 91.97(10)  | N(6)#1-Cd(1)-N(4)#2 | 174.92(10) |
| N(1)-Cd(1)-O(1)   | 138.72(10) | N(6)#1-Cd(1)-O(1)   | 92.23(11)  |
| N(4)#2-Cd(1)-O(1) | 86.64(10)  | N(1)-Cd(1)-O(2)     | 85.37(10)  |
| N(6)#1-Cd(1)-O(2) | 90.41(11)  | N(4)#2-Cd(1)-O(2)   | 92.89(11)  |
| O(1)-Cd(1)-O(2)   | 53.57(10)  | N(1)-Cd(1)-O(3)     | 138.87(10) |
| N(6)#1-Cd(1)-O(3) | 84.05(9)   | N(4)#2-Cd(1)-O(3)   | 90.89(9)   |
| O(1)-Cd(1)-O(3)   | 82.41(10)  | O(2)-Cd(1)-O(3)     | 135.43(10) |
| N(1)-Cd(1)-O(4)   | 88.20(10)  | N(6)#1-Cd(1)-O(4)   | 92.20(10)  |
| N(4)#2-Cd(1)-O(4) | 84.95(9)   | O(1)-Cd(1)-O(4)     | 132.58(9)  |
| O(2)-Cd(1)-O(4)   | 173.15(10) | O(3)-Cd(1)-O(4)     | 51.23(9)   |

Symmetry transformations used to generate equivalent atoms: #1 = x, -y+3/2, z+1/2; #2 = x, -y+3/2, z-1/2.
